1 Optogenetic activation of the neural circuit between dorsal raphe nucleus and the  
2 pre-Bötzinger complex contributes to inhibition of the seizure-induced respiratory arrest in  
3 the DBA/1 mouse SUDEP model

4 HaiXiang Ma<sup>1,2</sup>, Qian Yu<sup>1,2</sup>, Yue Shen<sup>1,2,3</sup>, XiTing Lian<sup>1</sup>, LeYuan Gu<sup>1,2</sup>, Han lu<sup>4</sup>, HaiTing Zhao<sup>5</sup>,  
5 Chang Zeng<sup>6</sup>, Kazuki Nagayasu<sup>7</sup>, HongHai Zhang\*<sup>1,2,3</sup>

6 <sup>1</sup>Department of Anesthesiology, Affiliated Hangzhou First People's Hospital, Zhejiang  
7 University School of Medicine, Hangzhou, 310006, China

8 <sup>2</sup>Department of Anesthesiology, the Fourth Clinical School of Medicine, Zhejiang Chinese  
9 Medical University, Hangzhou, 310006, China

10 <sup>3</sup>Department of Anesthesiology, Hangzhou First People's Hospital, Nanjing Medical  
11 University, Hangzhou, 310006, China

12 <sup>4</sup>Department of Anesthesiology, Ruijin Hospital, Shanghai Jiao Tong University School of  
13 Medicine, Shanghai, China

14 <sup>5</sup>Department of Neurology, Xiangya Hospital, Central South University, Changsha 410008,  
15 China.

16 <sup>6</sup>Department of Health Management Center, Xiangya Hospital, Central South University,  
17 Changsha, 410008

18 <sup>7</sup>Department of Molecular Pharmacology, Graduate School of Pharmaceutical Sciences,  
19 Kyoto University

20 HaiXiang Ma, Qian Yu and Yue Shen contributed equally to this work

21 Corresponding authors: HongHai Zhang

22 Email address: [zhanghonghai\\_0902@163.com](mailto:zhanghonghai_0902@163.com)

## 23 **Abstract**

24 Sudden unexpected death in epilepsy (SUDEP) is the fatal cause leading to the death of  
25 epilepsy patients, especially those with anti-epileptic drug resistance. However, the  
26 underlying mechanism of SUDEP remains elusive. Our previous study demonstrated that  
27 enhancement of serotonin (5-HT) synthesis by intraperitoneal (IP) injection of  
28 5-hydroxytryptophan (5-HTP) significantly reduced the incidence of seizure-induced  
29 respiratory arrest (S-IRA) in DBA/1 mice SUDEP models. Given that 5-HT<sub>2A</sub> receptor  
30 (5-HT<sub>2AR</sub>) plays an important role in mediating the respiration system in brain, we

1 hypothesized that 5-HT<sub>2A</sub>R is of great significance to modulate S-IRA and SUDEP. To test  
2 this hypothesis, we examined whether the decreased incidence of S-IRA evoked by either  
3 acoustic stimulation or PTZ injection by administration with 5-HTP will be blocked by  
4 administration with ketanserin (KET), a selective antagonist of 5HT<sub>2A</sub>R, in DBA/1 mice  
5 SUDEP models to examine the role of 5-HT<sub>2A</sub>R in modulating S-IRA. Our results suggested  
6 that the decreased incidence of S-IRA by 5-Hydroxytryptophan (5-HTP), a precursor for  
7 central nervous system (CNS) serotonin (5-HT) synthesis, was significantly reversed by IP or  
8 intracerebroventricularly (ICV) injection of ketanserin in our models. Furthermore, given that  
9 5-HT<sub>2A</sub>R locating in the pre-Bötzinger complex (PBC) which plays a key role in regulating  
10 the respiratory rhythm, we wonder whether the lower incidence of S-IRA by IP with 5-HTP  
11 was significantly reversed by KET which inhibits 5-HT<sub>2A</sub>R in the above models and acts on  
12 the 5-HT<sub>2A</sub>R in pre-Bötzinger complex .To test our hypothesis, we activated the neural  
13 circuit between dorsal raphe nucleus and the pre-Bötzinger complex by optogenetics  
14 technology. Our results indicated that the lower incidence of S-IRA evoked by PTZ by  
15 stimulating the TPH2-ChETA, a variant of channelrhodopsin-2 (ChR2) neurons in the dorsal  
16 raphe nucleus (DR) in DBA/1 mice and the suppressant effects was significantly reversed by  
17 administration of KET in bilateral pre-Bötzinger complex without changing  
18 electroencephalogram (EEG) activity. The neural circuit between DR and the pre-Botzinger  
19 complex was confirmed by injection of CTB555, a nerve tracer, in DR or the pre-Botzinger  
20 complex, respectively. Taken together, our findings suggested that targeting the neural circuit  
21 between the DR and the pre-Bötzinger complex in which 5-HT<sub>2A</sub>R plays a critical role in  
22 regulating this process would be promising to prevent SUDEP.

23 **Keywords:** sudden unexpected death in epilepsy; 5-Hydroxytryptophan (5-HTP); ketanserin  
24 (KET); pre-Bötzinger complex; dorsal raphe nucleus; 5HT<sub>2A</sub> receptor; respiration rhythm.

## 25 1. INTRODUCTION

26 Growing studies have shown that sudden unexpected death in epilepsy (SUDEP) is the  
27 most important cause leading to the death of epilepsy patients, especially those who suffered  
28 from antiepileptic drug resistance<sup>1-4</sup>. The latest advancements of the pathogenesis of SUDEP  
29 demonstrated that cardiopulmonary dysfunction plays an important role in the occurrence of  
30 SUDEP<sup>1-5</sup>. Our previous findings showed that seizure-induced respiratory arrest (S-IRA) can

1 lead to the occurrence of SUDEP evoked by either acoustic stimulation or pentylenetetrazole  
2 (PTZ) in DBA/1 murine models <sup>5-10</sup>, and the incidence of S-IRA by acoustic stimulation or  
3 PTZ was significantly reduced by 5-Hydroxytryptophan (5-HTP), a precursor for serotonin  
4 synthesis in two models of SUDEP <sup>5</sup>. However, the target of 5-HTP-mediated reduction of  
5 S-IRA and SUDEP in the brain remains unclear and still needs to be further explored. Due to  
6 that 5-HT<sub>2A</sub>R has emerged as a key factor in mediating respiratory function in brainstem<sup>11-13</sup>,  
7 we wonder if the application of 5-HTP could reduce the incidence of S-IRA by targeting  
8 5-HT<sub>2A</sub>R in the brain. Therefore, we hypothesized that the suppressant effects of 5-HTP on  
9 S-IRA would be reversed by ketanserin (KET), a selective antagonist for 5-HT<sub>2A</sub>R, in the  
10 DBA/1 mouse SUDEP models and that it may be a leading therapeutic target to prevent  
11 SUDEP.

12 To investigate the roles of 5-HTP and 5HT<sub>2A</sub>R in the pathogenesis of S-IRA and  
13 SUDEP, we continued to choose acoustic stimulation and PTZ injection DBA/1 mice SUDEP  
14 models to test the reversal effects of KET based on our previous study. The lower incidence of  
15 S-IRA by 5-HTP was significantly reversed by both intraperitoneal (IP) and  
16 intracerebroventricular (ICV) injection of KET in two models, respectively. Different from  
17 our previous study that atomoxetine reduced the incidence of S-IRA in DBA/1 mice by  
18 acoustic stimulation without affecting seizure behavior <sup>8-9</sup>, administration of 5-HTP  
19 significantly reduced the incidence of S-IRA through its anticonvulsant effects in our models.  
20 The anticonvulsant effects of 5-HTP were basically consistent with other studies that  
21 activation of 5-HT neurons can reduce the severity of seizure <sup>14-16</sup>. Meanwhile, administration  
22 of KET reversed the lower incidence of S-IRA by 5-HTP with producing only partly  
23 anticonvulsant effects, which suggested that 5-HT<sub>2A</sub>R in brainstem may be a specific target  
24 to prevent S-IRA and SUDEP. Furthermore, considering that 5-HT<sub>2A</sub>R located in the  
25 pre-Bötzinger complex which plays a key role in modulating respiration rhythm<sup>12</sup>, and that  
26 the incidence of S-IRA in DBA/1 mice can be significantly reduced by optogenetic activation  
27 of TPH2-ChR2 neurons in DR based on our previous findings, we further activated  
28 TPH2-ChETA neurons in the DR of DBA/1 mice to observe whether the suppression of  
29 S-IRA in PTZ injection model by photostimulating the DR depends on activating 5-HT<sub>2A</sub>R  
30 located in the pre-Bötzinger complex or not. It turned out that the lower incidence of S-IRA

1 evoked by PTZ by optogenetic activation of TPH2-ChETA neurons in the DR was remarkably  
2 reversed by injection of KET into the pre-Bötzinger complex. Meanwhile, the neural circuit  
3 between the DR and the pre-Bötzinger complex was confirmed by injection of tracer  
4 CTB-555 into the DR and the pre-Bötzinger complex, respectively. Thus, our findings  
5 suggested that activating the neural circuit between the DR and the pre-Bötzinger complex  
6 might contribute to preventing.

## 7 **2. MATERIALS AND METHODS**

### 8 **2.1 Animals**

9 All experimental procedures were in line with the National Institutes of Health Guidelines for  
10 the Care and Use of Laboratory Animals and approved by the Animal Advisory Committee of  
11 Zhejiang University. DBA/1 mice were housed and bred in the Animal Center of Zhejiang  
12 University School of Medicine and provided with rodent food and water ad libitum. In the  
13 acoustic stimulation murine model, DBA/1 mice were “primed” starting from postnatal day  
14 26-28 to establish consistent susceptibility to audiogenic seizures and S-IRA. PTZ-evoked  
15 seizure model, PTZ was administered to non-primed DBA/1 mice of approximately 8 weeks  
16 of age. The two models were established just as described previously<sup>5-10</sup>. TPH2-ChETA  
17 infected mice was established by viral delivery of pAAV-TPH2  
18 PRO-ChETA-EYFP-WPRES-PAS into the DR to express for 3 weeks and confirmed the  
19 expression of TPH2 -ChETA in DR by immunohistochemistry

### 20 **2.2 Seizure induction and resuscitation**

21 S-IRA was evoked by acoustic stimulation or intraperitoneal (IP) administration of PTZ, as  
22 previously described<sup>5-10</sup>. For the acoustic stimulation model, each mouse was placed in a  
23 cylindrical plexiglass chamber in a sound-isolated room, and audiogenic seizures (AGSZs)  
24 were evoked by an electric bell (96 dB SPL, Zhejiang People's Electronics, China). Acoustic  
25 stimulation was given for a maximum duration of 60 s or until the onset of tonic seizures and  
26 S-IRA in most mice in each group. Mice with S-IRA were resuscitated within 5 s post the  
27 final respiratory gasp using a rodent respirator (YuYan Instruments, ShangHai, China). S-IRA  
28 was also evoked in all non-primed DBA/1 mice by IP administration of a single dose of PTZ  
29 (Cat # P6500; Sigma-Aldrich, St. Louis, MO) at a dose of 75 mg/kg. Mice with S-IRA were  
30 resuscitated by using a small animal respirator (YuYan Company, ShangHai, China).

## 1 **2.3. Pharmacology experiment**

### 2 **2.3 .1 Effect of IP administration of KET on 5-HTP-mediated suppression of S-IRA** 3 **evoked by acoustic stimulation**

4 A vehicle or different doses of KET (Cat # 8006; Sigma-Aldrich) was administered to  
5 different groups of mice which were then acoustically stimulated. Susceptibility to S-IRA in  
6 primed DBA/1 mice was confirmed 24 h prior to treatment of 5-HTP ( Cat # 107751;  
7 Sigma-Aldrich) or vehicle, which was followed by KET administration ,respectively. 5-HTP  
8 or vehicle (saline) was administered i.p. once a day for 2 days and induction of S-IRA was  
9 performed 90 mins after the second administration. KET or vehicle (25% DMSO) was  
10 administered i.p. 30 mins before acoustic stimulation. The effects of 5-HTP and KET on  
11 S-IRA were examined and digitally recorded for offline analysis, respectively. Additionally,  
12 KET was administered by ICV injection 15 mins prior to PTZ injection as the selective  
13 antagonist of 5-HT<sub>2A</sub>R in DBA/1 mice in different groups from the same manner of 5-HTP  
14 administration. The incidences of S-IRA latency to AGSZs, duration of wild running, clonic  
15 seizures, tonic-clonic seizures, and seizure scores were videotaped for offline analysis <sup>5-10,</sup>  
16 <sup>17-18.</sup>

### 17 **2.3.2 Effect of ICV administration of KET on 5-HTP-mediated suppression of S-IRA by** 18 **PTZ**

19 Aiming at the ICV surgery, an ICV guide cannula (O.D.I.41×I.D.O.0.25mm/M3.5, 62004,  
20 RWD Life Science Inc.,China) was implanted into the right lateral ventricle (AP – 0.45 mm;  
21 ML – 1.0 mm; V-2.50 mm) to enable microinjections as previously described <sup>9</sup>. The groups to  
22 test as follows: 1) Saline (IP) was administered 75 mins prior to PTZ (75mg/kg, IP) and 25%  
23 DMSO at (2 µl, at a rate of 0.5 µl/min ICV) 15 min prior to PTZ injection as controls. 2)  
24 5-HTP (200mg/kg, IP) was administered 75 mins prior to PTZ (75mg/kg, IP) and 25% DMSO  
25 (2 µl, at a rate of 0.5 µl/min ICV) 15 min prior to PTZ injection. 3) 5-HTP (200mg/kg, IP)  
26 was administered 75 mins prior to PTZ (75mg/kg, IP), and KET (4.764 nmol and 9.528 nmol,  
27 dissolved in 2 µl 25% DMSO, at a rate of 0.5 µl/min ICV) 15 min prior to PTZ injection. The  
28 timing of 5-HTP administration in the above groups was in the manner of administering i.p.  
29 once a day for 2 days.

## 30 **2.4 Optogenetics experiments**

#### 1 **2.4.1 Stereotactic surgery**

2 DBA/1 mice at 8 weeks of age were anesthetized with 3.5% chloral hydrate and head-fixed in  
3 a stereotaxic apparatus, (68018, RWD Life Science Inc.,Shenzhen,China). During the entire  
4 process of surgery, the body temperature of anesthetized mice was kept constant at 37 °C  
5 using a heating pad. If the DBA/1 mice had a pain reflect in response with a paw pinch, then  
6 additional 10% of initial dosage of sodium pentobarbital was given to guarantee a painless  
7 state. Other procedures were basically the same with our previous methods concerning the  
8 optogenetics experiments. For optogenetic viral delivery of pAAV-TPH2  
9 PRO-ChETA-EYFP-WPRES-PAS, microinjection (100nl,40nl/min) was performed using the  
10 following stereotaxic coordinates for the DR ( AP-4.55mm , ML-0.44mm ,  
11 DV-2.80mm,10°right ) based on the mouse brain atlas. Viruses were delivered via a gauge  
12 needle by an Ultra Micro Pump (160494 F10E, WPI) over a period of 10 mins; the syringe  
13 was not removed until 15-20 min after the end of infusion to allow diffusion of the viruses.  
14 Then, the optical fiber (FOC-W-1.25-200-0.37-3.0,Inper,Hangzhou,China) was implanted  
15 above the area ( AP-4.55mm , ML-0.44mm , DV-2.80mm,10°right ) for 0.05 mm  
16 ( AP-4.55mm, ML-0.44 mm, DV-2.75 mm,10°right). For ICV surgery and an ICV guide  
17 cannula implantation was the same to the pharmacology experiment, and was implanted with  
18 a headstage for EEG in the same mice as previously described. For the *microinjection of KET*  
19 in the bilateral pre-Bötzing complex, two sides of guide cannula  
20 ( O.D.0.48×I.D.0.34mm/M3.5, 62033, RWD Life Sience Inc.,Shenzhen, China) implantation  
21 were performed. CTB-555 100nl (1µg/µL, BrainVTA Technology Co.Ltd, Wuhan, China) was  
22 injected in the DR ( AP-4.55mm, ML-0.44mm, DV-2.80mm,10°right ) or the right side  
23 of the pre-Bötzing complex ( AP-6.80mm, ML-1.25mm, DV-4.95mm ) at a total content  
24 of ~100nL and we waited ~2 weeks to allow the retrograde labeling of projection neurons,  
25 respectively.

#### 26 **2.4.2 Effect of ICV administration of KET on photostimulating of the DR-mediated** 27 **suppression of S-IRA by PTZ and on EEG changes**

28 DBA/1 mice undergone by viral delivery of pAAV-TPH2 PRO-ChETA-EYFP-WPRES-PAS  
29 into the DR and implanted an ICV guide cannula with a headstage for EEG for 3 weeks will  
30 be used. Those DBA/1 mice were divided into 3 groups. For the control group without

1 photostimulation of DR (n=7), ICV of the same concentration and volume of vehicle was  
2 given at the manner (25% DMSO, 2  $\mu$ l, at a rate of 0.5  $\mu$ l/min) prior to IP injection of PTZ  
3 (75mg/kg) for 30 mins. For the group treatment by photostimulation of DR without ICV of  
4 KET (n=6), ICV of the same concentration and volume of vehicle was given prior to the  
5 duration of photostimulation for 15mins and to IP injection of PTZ (75mg/kg) for 30 mins.  
6 For another group treatment by photostimulation of DR with ICV of KET(n=7), ICV of KET  
7 with the total content of 18.3 nmol was given prior to the duration of photostimulation for  
8 15mins and to IP injection of PTZ (75mg/kg) for 30 mins. The statistical analyses of  
9 incidence of S-IRA was performed , respectively. EEG recordings of 3 groups started before  
10 PTZ injection for 5 mins and ended post PTZ for 30mins. The statistical analyses of EEG  
11 activities were performed as previously described. The parameter of photostimulating of the  
12 DR (blue-light, 478 nm, 20 Hz, 10 ms/pulse and 600 pulses, 15 mW ,20mins) was used in the  
13 above mice.

#### 14 **2.4.3 Effect of microinjection of KET in the bilateral pre-Bötzing complex** 15 **administration of KET on photostimulating the DR-mediated suppression of S-IRA by** 16 **PTZ**

17 DBA/1 mice undergone by viral delivery of pAAV-TPH2 PRO-ChETA-EYFP-WPRES-PAS  
18 into the DR and with the bilateral pre-Bötzing complex guide cannula implantation for 3  
19 weeks will be used. For the group treated by photostimulation of DR without administration  
20 of KET (n=7), microinjection of the same concentration and volume of vehicle into  
21 bilateral pre-Bötzing complex was given in the manner (25% DMSO, 2  $\mu$ l, at a rate of 0.5  
22  $\mu$ l/min) prior to IP injection of PTZ (75mg/kg) for 25 mins. For another group treated by  
23 photostimulation of DR with administration of KET (n=7), microinjection of KET with  
24 200nl into every unilateral/bilateral pre-Bötzing complex prior to IP injection of PTZ  
25 (75mg/kg) for 25 mins. Both groups would be started laser stimulation after microinjection  
26 for 10 mins. Total content of KET 400nl the bilateral pre-Bötzing complex was given for  
27 one mouse. The parameter of photostimulating of the DR (blue-light, 478 nm, 20 Hz, 10  
28 ms/pulse and 600 pulses, 15 mW ,20 mins) was used in the above mice. For the laser  
29 stimulation, 465-nm blue-light (20Hz, 20ms Pulse Width, 15 mW) was delivered by the  
30 laser (B12124, Inper, Hangzhou, China) through a 200- $\mu$ m optic fiber.

#### 1 **2.4.4 Immunohistochemistry and histology**

2 The placement of the optical fiber cannula tip including ICV and microinjection of KET with  
3 bilateral pre-Bötzing complex in each implanted mouse was verified by histology. After the  
4 novelty-seeking test approximately 30mins, DBA/1 mice were sacrificed and perfused with  
5 PBS and 4% PFA. After saturated in 30% sucrose (24h), each brain was sectioned into 30µm  
6 thickness of coronal slices with a freezing microtome (CM30503, Leica Biosystems, Buffalo  
7 Grove, IL,USA), the sections were first washed in PBS 5mins for 3 times and then incubated  
8 in blocking solution containing 10% normal donkey serum (017-000-121, Jackson  
9 ImmunoResearch, West Grove, PA), 1% bovine serum albumen (A2153, Sigma-Aldrich, St.  
10 Louis, MO), 0.3% Triton X-100 in PBS for 1 h at room temperature. Then, for c-fos or TPH2  
11 staining in DR, sections were incubated at 4°C overnight in rabbit anti-c-fos(1:1000 dilution,  
12 2250T Rabbit mAb /74620 Mouse mAb, Cell Signaling Technolog,Danvers,  
13 Massachusetts, USA) primary antibody or mouse anti-TPH2 (1:100 dilution, T0678,  
14 Sigma-Aldrich, St. Louis, MO) primary antibody and donkey anti-mouse Alexa 488  
15 secondary antibody (1:1000; A32766, Thermo Fisher Scientific, Waltham, MA, USA), donkey  
16 anti-mouse Alexa 546 (1:1000; A10036, Thermo Fisher Scientific, Waltham, MA, USA)  
17 secondary antibody or goat anti-rabbit cy5 (1:1000; A10523, Thermo Fisher Scientific,  
18 Waltham, MA, USA) secondary antibody for 2h at room temperature. Similarly, for NK1 or  
19 SA-2A staining in PBC, sections were incubated in rabbit anti-NK1(1:1000 dilution,  
20 SAB4502913, Sigma-Aldrich, St. Louis, MO) primary antibody or mouse anti-SA-2A (1:100  
21 dilution, sc-166775, Santa Cruz Biotechnology, Dallas,USA) primary antibody at 4°C  
22 overnight and donkey anti-rabbit Alexa 488 secondary antibody (1:1000; A32766, Thermo  
23 Fisher Scientific, Waltham, MA, USA), donkey anti-mouse Alexa 546 (1:1000; A10036,  
24 Thermo Fisher Scientific, Waltham, MA, USA) secondary antibody or goat anti-mouse cy5  
25 (1:400; A10524, Thermo Fisher Scientific, Waltham, MA, USA) secondary antibody for 2h at  
26 room temperature. After washing with PBS 15mins for 3 times, the sections were mounted  
27 onto glass slides and incubated in DAPI (1:4000;Cat# C1002; Beyotime Biotechnology;  
28 Shanghai,China) 7mins at room temperature.Finally,the glass slides were sealed sheet by  
29 Anti-fluorescence attenuating tablet.All images were taken with Nikon A1 laser-scanning  
30 confocal microscope (Nikon, Tokyo, Japan).The numbers of immunopositive cells were



1 counted and analyzed using ImageJ (NIH, Baltimore, MD). It is worth noting that the mouse  
2 of the implantation placement out of the target of brain structure will be abandoned in our  
3 experiments. The positive cells co-expression c-fos, ChETA and TPH2 were counted as  
4 previously described<sup>7</sup>.

#### 5 **2.4.5 Viral vectors**

6 pAAV-TPH2 PRO-ChETA-EYFP-WPRES-PAS (AVV2/8) (viral titers:  $6.13 \times 10^{13}$  VG/ml),  
7 were purchased from Sheng BO, Co., Ltd (Sheng BO Co. Ltd, Shanghai, China). and the  
8 sequence of vectors was designed source by Kazuki Nagayasu (Department of Molecular  
9 Pharmacology Graduate School of Pharmaceutical Sciences, Kyoto University).  
10 CTB-555 ( $1 \mu\text{g}/\mu\text{L}$ ) was purchased from BrainVTA Technology Co.Ltd (Wuhan, China) .

#### 11 **2.5 Data analysis**

12 All data are presented as the mean  $\pm$  SEM. Statistical analyses were performed using SPSS 23  
13 (SPSS Software Inc.,USA). The incidence of S-IRA in different groups was compared using  
14 Wilcoxon Signed Rank test. Seizure scores and the latency to AGSZs, the duration of wild  
15 running, clonic seizures, tonic-clonic seizures were evaluated using the one-way ANOVA  
16 tests or Mann Whitney U test or Kruskal-Wallis H test. ANCOVA was used to compare  
17 c-fos-positive cells in the DR of DBA/1 mice with and without photostimulation. Statistical  
18 significance was inferred if  $p < 0.05$ .

### 19 **3. Results**

#### 20 **3.1 5-HTP-mediated suppression of S-IRA evoked by acoustic stimulation was reversed** 21 **by IP with KET**

22 Compared with vehicle group in primed DBA/1 mice, the incidence of S-IRA evoked by  
23 acoustic stimulation was significantly reduced by 5-HTP with the dosage of 200 mg/kg ,i.p  
24 ( $p < 0.001$  ). Compared with vehicle group, the incidence of S-IRA in the group pre-treated  
25 with 5-HTP (200mg/kg, i.p) + KET (5,10, 25 mg/kg,i.p) was significantly decreased ( $p < 0.01$ ,  
26  $p < 0.05$ ), instead, which indicated the these dosages of KET didn't significantly reversed the  
27 lower incidence of S-IRA by 5-HTP. By contrast, there was no difference between the vehicle  
28 group and the group with treatment with 5-HTP (200mg/kg, i.p) + KET (20 mg/kg,i.p) ( $p >$   
29  $0.005$ ) and the incidence of S-IRA was significantly reduced in the group (5-HTP +25%  
30 DMSO) compared with the group (KET, 20 mg/kg,i.p) ( $p < 0.05$ ), on the contrary, the

1 suppressant effects by 5-HTP was markedly reversed administration with KET (20 mg/kg, i.p).  
2 (Figure 1)

### 3 **3.2 5-HTP-mediated suppression of S-IRA evoked by PTZ was reversed by ICV with** 4 **KET**

5 Compared with vehicle control group, the incidence of S-IRA by PTZ was significantly  
6 reduced in the group treatment with 5-HTP and 25% DMSO (i.c.v) (  $p < 0.05$ ). Compared  
7 with vehicle control group, the incidence of S-IRA by PTZ was not significantly reduced in  
8 the group treatment with 5-HTP and the KET (9.15 nmol, i.c.v) ( $p > 0.05$ ), and compared with  
9 the group treated with 5-HTP and 25% DMSO (i.c.v), the incidence of -S-IRA in the group  
10 treated with 5-HTP and the KET (9.15 nmol, i.c.v) was significantly increased ( $p < 0.05$ ),  
11 which suggested that the suppressant effects of S-IRA by 5-HTP was significantly reversed by  
12 KET with the dosage of 9.15 nmol (i.c.v). Furthermore, compared with vehicle control group,  
13 the incidence of S-IRA in the group with 5-HTP + KET (18.30 nmol, i.c.v) was not  
14 significantly reduced ( $p > 0.05$ ) and the incidence of S-IRA by PTZ in the group treatment  
15 with 5-HTP and 25% DMSO (i.c.v) was significantly reduced compared with the group with  
16 5-HTP and KET (18.30 nmol,i.c.v) ( $p < 0.05$ ), instead, the suppressant effects of S-IRA by  
17 5-HTP can be significantly reversed by the dosage of KET (18.30 nmol, i.c.v). There were no  
18 significant intergroup differences in latencies to AGSZs, durations of wild running, clonic  
19 seizures, tonic-clonic seizures and seizure scores (AGSZs latencies:  $p = 0.763$ ,  $F = 6$ ;  
20 durations of wild running:  $p = 0.14$ ,  $F = 6$ ; duration of tonic-clonic seizures:  $p = 0.119$ ,  $F = 6$ ;  
21 seizure scores:  $p = 0.304$ ,  $F = 6$ ) (Fig. 1). The seizure score of two models from different  
22 groups was no significantly difference ( $p > 0.05$ ), no obvious intervention in seizure behavior  
23 of the reversed effects by KET was to be fund. (Figure 2)

### 24 **3.3 Selective expression of ChETA on 5-HT neurons in the DR of DBA/1 mice**

25 The viral of pAAV-TPH2 PRO-ChETA-EYFP-WPRES-PAS, under the control of promoter of  
26 TPH2, was delivered into the DR of wild DBA/1 mice with 50 days to express for 3 weeks to  
27 create theTPH2-ChETA mice. We first examined the expression of ChETA and TPH2 in 5-HT  
28 neurons in the DR of DBA/1 mice using immunohistochemistry (n = 3 mice). The expression  
29 of GFP, a surrogate marker for ChETA, was predominantly localized on the membrane of cell  
30 body and axons of 5-HT neurons of the DR. TPH2 was predominantly confined to the cytosol

1 of 5-HT neurons in the DR of DBA/1 mice. The merged expression ratio of ChETA and TPH2  
2 was basically consistent with our previous data that the co-expression of ChR2 and TPH2 was  
3 located on the walls of 5-HT neurons in the DR of DBA/1 mice<sup>7</sup>. (Figure 3, Figure 4)

#### 4 **3.4 Activation of 5-HT neurons in the DR reduces S-IRA evoked by PTZ injection in** 5 **DBA/1 mice and the the lower incidence of S-IRA by photostimulating the DR was** 6 **significantly reversed by ICV of KET**

7 We examined the effect of selective enhancement of 5-HT neurotransmission on S-IRA by  
8 PTZ by applying photostimulation (blue light, 20 ms pulse duration, 20 Hz, 20 mins) to 5-HT  
9 neurons in the DR of noprimered DBA/1 mice. Comapred with the incidence of S-IRA by PTZ  
10 of DBA/1 mice without photostimulation (n=7), photostimulation of the DR for 20 mins  
11 significantly decreased the incidence of S-IRA in DBA/1 mice (n=6,  $p < 0.05$ ). However, the  
12 incidence of S-IRA evoked by PTZ by photostimulation of the DR with the same parameter  
13 by ICV administration of KET was significantly (n=7,  $p < 0.05$ ), which indicated the lower  
14 incidence of S-IRA by PTZ via photostimulating the DR was significantly reversed by  
15 blocked 5HT2A receptor in tthe brain. (Figure 5)

#### 16 **3.5 Activating 5-HT neurons in the DR to reduce S-IRA evoked by PTZ and the reverse** 17 **effects to be given for KET produced obvious effects on EEG activity at the different** 18 **stages**

19 Based on the above findings in the same groups, we further examined the effect of activating  
20 5-HT neurons in the DR to reduce incidence of S-IRA and the reversal effect by KET on EEG  
21 activity. Compared with the group without light, the EEG activity was significantly reduced.  
22 Analyzing the EEG wave, Delta wave of EEG was significantly reduced by light and reversed  
23 by KET ( $p < 0.05$ ). There is no obvious changes of Theta, Alpha, Beta and Gamma waves in  
24 different treatment groups. The findings of EEG activity may reflect the specificity of 5-HTA  
25 receptor in brain modulating S-IRA and SUDEP. (Figure 6)

#### 26 **3.6 The reduction of S-IRA by photostimulating the DR is dependent on 5-HT2A** 27 **receptor locating the pre-Bötzing complex**

28 Although the incidence of S-IRA can be reduced by 5-HTP and by photostimulating DR and  
29 was significantly reversed by both P and ICV injection of KET, it still was to determine  
30 whether 5-HT2A receptor in the pre-Bötzing complex mediated the process of S-IRA and

1 SUDEP. The incidence of S-IRA evoked by PTZ by photostimulating the DR was 14.28%.  
2 However, the incidence of S-IRA evoked by PTZ by photostimulating the DR with  
3 microinjection of KET into bilateral pre-Bötzing complex with total volume of 400 nl was  
4 85.71% . Compared with the group by photostimulating DR without microinjection of KET,  
5 the incidence of S-IRA in the group by photostimulating DR with microinjection of KET was  
6 significantly reduced (  $p < 0.01$ ). Subsequently, the existing of neural circuit between DR and  
7 the pre-Bötzing complex was verified by using a nerve tracer named as CTB-555. Therefore,  
8 in the present study, optogenetic activation of the neural circuit between DR and the  
9 pre-Bötzing complex contributes to inhibit the S-IRA and 5-HT<sub>2A</sub> receptor in the  
10 pre-Bötzing complex may be a specific target to intervene for preventing SUDEP. (Figure  
11 7-9)

### 12 **3.7 Photostimulation increases c-fos expression in the 5-HT neurons in the DR**

13 To investigate whether photostimulation increased the excitability of 5-HT neurons, we  
14 examined the neuronal expression of c-fos, an immediate early gene that is widely accepted as  
15 a marker for neuronal activity in optogenetics studies in the DR of DBA/1 mice with  
16 photostimulation and those without photostimulation. Compared with the c-fos expression in  
17 5-HT neurons in the DR of DBA/1 mice without photostimulation (n=2) , the expression of  
18 c-fos in 5-HT neurons in the DR was significantly increased in the group with  
19 photostimulation (20 ms pulse duration, 20 Hz) at 15 mW for 20 min ( n=2,  $p < 0.05$ ),  
20 which showed the reduction of S-IRA by photostimulation via activating 5-HT neurons.  
21 (Figure 10)

## 22 **4. DISCUSSION**

23 SUDEP is a fatal complication for epilepsy patients. Although initial advancements about  
24 5-HT nerve system have been made to identify the causes of SUDEP, the pathogenesis of  
25 SUDEP still seems elusive<sup>1-4</sup>. Currently, respiratory dysfunction during seizures has been  
26 regarded as a leading mechanism of SUDEP. Some studies indicated that several selective  
27 serotonin (5-HT) reuptake inhibitors (SSRIs) can prevent S-IRA in DBA/1 mice evoked by  
28 generalized audiogenic seizures (AGSz) by elevating 5-HT levels in the synaptic cleft<sup>13-16</sup>.  
29 However, due to the limitation of animal SUDEP models, the role of 5-HT synthesis and  
30 targeting 5-HT receptors in brain in modulating S-IRA and SUDEP remains unclear and still

1 needs to be further explored.

2 It had been accepted that tryptophan hydroxylase-2 (TPH2) in brain could convert  
3 l-tryptophan to 5-HTP, which can be further converted to 5-HT by aromatic L-amino acid  
4 decarboxylase <sup>19-21</sup>. A previous study showed that TPH2 is the rate-limiting enzyme in 5-HT  
5 synthesis in brain <sup>19</sup>. Although we only tested the protein changes of TPH2 in our previous  
6 study, another study had tested the correlation between TPH2 protein and activity which  
7 showed that TPH2 protein varied consistently with TPH2 activity in the same model <sup>22</sup>. Thus,  
8 it is vital for TPH2 to make endogenous 5-HTP convert into serotonin synthesis to reduce the  
9 incidence of S-IRA and prevent SUDEP. However, it is unknown how 5-HT mediated S-IRA  
10 and SUDEP in our model.

11 Based on our previous study that administration of 5-HTP significantly reduced the  
12 incidence of S-IRA in AGSz and PTZ SUDEP models, it is essential for us to further identify  
13 in which 5-HT<sub>2A</sub>R in the brain plays a key role in modulating the pathogenesis of S-IRA in  
14 our models. In our models, the lower incidence of S-IRA by 5-HTP was significantly reversed  
15 by IP or ICV injection of KET in the SUDEP models evoked by acoustic stimulation and PTZ  
16 administration, a chemoconvulsant that is widely used to model human generalized seizures.  
17 While KET reversed the suppressant effects of S-IRA by administration of 5-HTP in a  
18 dose-dependent manner in PTZ injection model, there was a ceiling effect of KET on  
19 reversing the lower incidence of S-IRA by 5-HTP in the acoustic stimulation SUDEP model.

20 Our previous study showed that administration of 5-HTP significantly reduced the  
21 incidence of S-IRA by anti-convulsant effects. This indicated that most of DBA/1 mice  
22 avoided S-IRA without producing tonic-clonic seizures other than wild running and  
23 generalized clonic seizures, which remained the sensitivity for seizures. However,  
24 administration of KET increased the lower incidence of S-IRA by 5-HTP in both acoustic  
25 stimulation and PTZ injection models with producing partly wild running, clonic and/or tonic  
26 -clonic seizures, which demonstrated administration of IP of KET reversed the lower  
27 incidence of S-IRA by 5-HTP with only partly affecting seizure behaviors by acting on the  
28 neuron nucleus functioning in respiratory activity.

29 To further determine the effects of KET on the incidence of S-IRA by acting on the central  
30 nucleus in the brain, we administrated KET with ICV pathway and measured its effect on

1 S-IRA in DBA/1 mice in both SUDEP models, respectively. The results of KET mediated the  
2 reversal effects of the S-IRA incidence by 5-HTP via IP injection in line with via ICV  
3 injection, suggesting that the reversal effects by KET in our models are independent of  
4 SUDEP models .

5 Meanwhile, S-IRA in most of DBA/1 mice recovered at 24-72 hours between different  
6 treatment groups, which showed the recovery interval of S-IRA depended on the  
7 concentration of 5-HT in brain. In addition, we find that there is a dose-dependent effect on  
8 reversing the incidence of S-IRA by 5-HTP and a ceiling effect with KET 25mg/kg (i.p).  
9 Indeed, our previous study showed that the lower incidence of S-IRA by activating 5-HT  
10 neurons in the DR by optogenetics was significantly reversed by ondansetron, a specific  
11 antagonist for 5-HT<sub>3</sub> receptor<sup>7</sup>. However, it can't rule out that 5-HT<sub>2A</sub> receptor mediated the  
12 pathogenesis of S-IRA and SUDEP by closely interacting with 5-HT<sub>3</sub> receptor in the brain.  
13 Of course, it needs to be further tested in the future experiments.

14 Although an SSRI is also found effective in reducing S-IRA evoked by maximal  
15 electroshock (MES) in *Lmx1b(f/f)* mice on a primarily C57BL/6J background, a strain that is  
16 resistant to AGSz and depleting 5-HT neurons enhanced the seizure severity, which led to the  
17 S-IRA and can be prevented by 5-HT<sub>2A</sub>R activation through IP with  
18 (2,5-dimethoxy-4-iodophenylpropane hydrochloride, DOI), a selective agonist for 5-HT<sub>2A</sub>R,  
19 in MES model <sup>15</sup>, it was unclear whether depleting 5-HT neurons itself led to S-IRA and the  
20 reversal effects by DOI targeted the peripheral or central 5-HT<sub>2A</sub>R. By contrast, based on our  
21 previous findings, we further explored the role of 5-HT neurotransmission and 5-HT<sub>2A</sub>R by  
22 peripheral and central intervention approaches with KET, a selective antagonist for 5-HT<sub>2A</sub>R,  
23 in different SUDEP models. Thus, according to our findings, the role of 5-HT<sub>2A</sub>R in  
24 modulating S-IRA supported by those from the MES model will further strengthen the  
25 understanding of the pathogenesis of S-IRA and SUDEP in the 5-HT nerve system, which  
26 will help design therapeutic strategies to prevent SUDEP.

27 What's more, based on 5-HT<sub>2A</sub>R located in the pre-Bötzing complex which plays an  
28 important role in modulating respiration rhythm and on our previous finding that the  
29 incidence of S-IRA can be significantly reduced by activation of TPH2-ChR2 neurons in the  
30 DR, to further test the above pharmacology experiment concerning the exact mechanisms of

1 the interaction between 5-HT and 5-HT<sub>2A</sub>R mediating S-IRA and SUDEP in the same  
2 models, we used the optogenetics methods to test whether activation of TPH<sub>2</sub>-ChR2 neurons  
3 in the DR significantly reduced the incidence of S-IRA evoked by PTZ via activating  
4 5-HT<sub>2A</sub>R in the pre-Bötzing complex or not. In the present study, the lower incidence of  
5 S-IRA evoked by PTZ via optogenetic activation of TPH<sub>2</sub>-ChETA neurons in the DR was  
6 remarkably reversed by ICV injection of KET. Subsequently, the lower incidence of S-IRA  
7 evoked by PTZ by photostimulating the DR was significantly reversed by microinjection of  
8 KET into bilateral pre-Bötzing complex, in turn, suggesting that photostimulating the DR  
9 remarkably reduced the incidence of S-IRA by activating 5-HT<sub>2A</sub>R in the pre-Bötzing  
10 complex in our model. To further test the bridge between DR and the pre-Bötzing complex  
11 to modulate S-IRA in our study, CTB-555, a nerve tracer, was used in our study to confirm  
12 and establish the neural circuit between the DR and the pre-Bötzing complex. Thus, the  
13 lower incidence of S-IRA in PTZ evoked models by photostimulating DR stem from the  
14 neural circuit between the DR and the pre-Bötzing complex. However, we only tested it  
15 using photostimulating the DR and direct inhibiting 5-HT<sub>2A</sub>R in the bilateral pre-Bötzing  
16 complex in our study. Whether activating TPH<sub>2</sub>-neurons in the pre-Bötzing complex could  
17 reduce the incidence of S-IRA still needs to be verified in the following experiments. Of  
18 course, other neural circuits between dorsal raphe nucleus and other brain structures involved  
19 in modulating S-IRA and SUDEP can't be excluded in our models. Nevertheless,  
20 pharmacologic and optogenetic findings suggested that the neural circuit between the DR and  
21 the pre-Bötzing complex plays a key role in modulating S-IRA and SUDEP.

22 In addition, different from the pharmacology experiments, although S-IRA of DBA/1  
23 mice was blocked in optogenetic experiments, most of DBA/1 mice remained clonic and tonic  
24 seizures. Analyzing of the cause for difference, the specificity of optogenetics and the specific  
25 injection of KET by both of ICV and pre-Bötzing complex may be a cause. Meanwhile, the  
26 incidence of S-IRA evoked by PTZ was significantly reduced by activating the neural circuit  
27 between DR and the pre-Bötzing complex without changing EEG activities, which  
28 contributed to reflecting the specificity of optogenetic experiments to inhibit S-IRA from  
29 another level as well.

## 30 **5. Conclusion**

1 Our current data suggested that the lower incidence of S-IRA by administration of 5-HTP can  
2 be significantly reversed by KET. Furthermore, the suppressant effects of optogenetic  
3 activating the neural circuit between DR and the pre-Bötzing complex on S-IRA were  
4 obviously reversed by KET in the DBA/1 mice as well. Therefore, 5-HT<sub>2A</sub>R in the  
5 pre-Bötzing complex may be a specific and key target to intervene for preventing SUDEP.

## 6 **6. Funding**

7 The work was supported by the National Natural Science Foundation of China (Grant.NO:  
8 81771403 and 81974205); by the Natural Science Foundation of Zhejiang Province  
9 (LZ20H090001); by the Program of New Century 131 outstanding young talent plan top-level  
10 of Hang Zhou to HHZ, and by the National Natural Science Foundation of China (Grant.NO:  
11 81,771,138) to Han Lu; by the National Natural Science Foundation of China (Grant.NO:  
12 82001379) to HTZ, and by National Natural Science Foundation of China (No. 81501130, Dr.  
13 Chang Zeng), Natural Science Foundation of Hunan Province, China (No. 2021JJ31047, Dr.  
14 Chang Zeng).

## 15 **7. ACKNOWLEDGEMENTS**

16 We are grateful to Yi Shen and Yu Dong Zhou for developing the experimental design

## 17 **8. DISCLOSURE**

18 All authors declare no competing interests. We confirm that we have read the Journal's  
19 position on issues involved in ethical publication and affirm that this study is in accordance  
20 with those guidelines.

## 21 **9. Figure legends**

22 **Figure 1 5-HTP-mediated reduction of S-IRA evoked by acoustic stimulation was**  
23 **significantly reversed by prazosin.**

24 A. evoked by acoustic stimulation was markedly lower in groups treated with 5-HTP and  
25 DMSO,\*  $p = 0.031$ ,  $p < 0.05$  ). Compared to the control group treated with vehicle, the  
26 incidence of S-IRA was significantly reduced in the group treated with 5-HTP and KET (5-10  
27 mg/kg). However, there was no difference between the control group and the group treated  
28 with 5-HTP and KET (20 mg/kg). Furthermore, compared with the group treated with 5-HTP  
29 and DMSO, the incidence of S-IRA in the group treated with 5-HTP and KET (20 mg/kg) was  
30 increased. B. There were no intergroup differences in latencies to AGSZs, durations of wild



1 running plus clonic seizures (W+C), tonic-clonic seizures, and seizure scores ( $p > 0.05$ ).

2 **Figure 2 5-HTP-mediated reduction of S-IRA evoked by PTZ was significantly reversed**  
3 **by KET**

4 A. Compared to the control group, S-IRA evoked by PTZ was markedly lower in groups  
5 treated with 5-HTP and DMSO. However, there is no difference between the control group  
6 and the groups treated with 5-HTP and KET ( 9.15 and 18.30 nmol). By contrast, the  
7 incidence of S-IRA was significantly reduced in the group treated with 5-HTP and i.c.v  
8 DMSO as compared with both groups treated with 5-HTP and KET ( 9.15 and 18.30 nmol).

9 B. C-F. There were no intergroup differences in latencies to AGSZs, durations of wild  
10 running plus clonic seizures (W+C), tonic-clonic seizures, and seizure scores ( $p > 0.05$ ).  
11 S-IRA, seizure-induced respiratory arrest; AGSZs, audiogenic seizures; i.p., intraperitoneal  
12 injection; DMSO, dimethyl sulfoxide. (mean  $\pm$  SEM) .

13 **Figure 3 Selective expression of ChETA on 5-HT neurons in the DR of DBA/1 mice**

14 a1, a2 and a3, neuronal immunostaining of GFP, a surrogate marker for ChETA, on 5-HT  
15 neurons in the DR of a coronal brain slice. b1, b2 and b3, immunostaining of TPH2, a key  
16 enzyme for 5-HT synthesis in the central nervous system (CNS). a1, b1, c3 and d1, merged  
17 images, showing the co-expression of TPH2 and GFP in 5-HT neurons. These data  
18 demonstrate that ChETA is restrictively expressed on the surface of 5-HT neurons in the DR( $n$   
19 = 3 mice). Confocal image magnifications: a1–d1, 10x; a2–d2, 20x; a3–d3, 40x.

20 **Figure 4 Placement of fiberoptic cannula tips in the DR**

21 A. An example of coronal brain slice, showing the location of a optic fiber cannula tip and  
22 the expression of ChETA in the DR of a DBA/1 mouse, according to the mouse atlas of  
23 Paxinos and Franklin (4th Edition, Paxinos and Franklin,2013). B, the neuronal  
24 immunostaining of co-expression of ChETA and TPH2 in the DR of a DBA/1 mouse. No  
25 thermal injury due to photostimulation was observed in the area around the fiberoptic tips.

26 **Figure 5 Optogenetic activation of TPH2-ChETA neurons in DRN-mediated reduction of**  
27 **S-IRA evoked by PTZ was significantly reversed by ICV injection of KET without**  
28 **changing seizures behavior**

29 A. Compared with the control group by treatment PTZ without photostimulation, the  
30 incidence of S-IRA by PTZ was significantly reduced by photostimulation ( $n=7$ ,  $n=6$ ,  $p <$

1 0.05). However, the lower incidence of S-IRA by photostimulation was remarkably reversed  
2 by ICV injection of KET with the total content of 18.3 nmol (n=6, n=7,  $p < 0.05$ ). No  
3 obvious difference between treatment groups in the analysis of seizure score, duration of  
4 wild ruing and clonic seizure, GSzs latency and duration of tonic seizure was to be found.

5 **Figure 6 The changing of EEG activity between optogenetic activation of TPH2-ChETA**  
6 **neurons in DRN-mediated reduction of S-IRA by PTZ and it was significantly reversed**  
7 **by ICV injection of KET**

8 A. Compared with the control group by treatment PTZ without photostimulation, the EEG  
9 activity of duration clonic seizure and tonic seizure was significantly suppressed in the group  
10 treatment PTZ with photostimulation. B. However, the suppression of EEG activity was  
11 significantly increased in the group in the group treatment PTZ with photostimulation by  
12 microinjection ICV of KET. C. Data wave of EEG activities was significantly reduced by  
13 light and reversed by KET.

14 **Figure 7 Optogenetic activation of TPH2-ChETA neurons in DRN-mediated reduction of**  
15 **S-IRA evoked by PTZ was significantly reversed by injection of KET into the**  
16 **pre-Bötzing complex**

17 Compared with the control group by treatment PTZ with photostimulation, the incidence of  
18 S-IRA by PTZ was significantly reduced by photostimulation by microinjection of KET into  
19 the bilateral pre-Bötzing complex with the total volume of 400 nl . No obvious difference  
20 between treatment groups in the analysis of seizure score, duration of wild ruing and clonic  
21 seizure, GSzs latency and duration of tonic seizure was to be found.

22 **Figure 8 The neural projection from DRto the pre-Bötzing complex was established by**  
23 **application of a nerve tracer of CTB555**

24 A. An example of coronal brain slice, showing the location of a injection of CTB555 with  
25 the co-expression with TPH2 in DRN. B. The projection to pre-Bötzing complex with the  
26 co-expression between NK1 and 5HT2AR .

27 **Figure 9 The neural projection from pre-Bötzing complex to the DRwas established by**  
28 **application of a nerve tracer of CTB555**

29 B. An example of coronal brain slice, showing the location of a injection of CTB555 with  
30 the co-expression with NK1 and 5HT2AR in DRN. B. The projection to DRwith the

1 co-expression between TPH2 and CTB555 .

2 **Figure 10 C-fos expression was significantly increased in DRby photostimulation of**  
3 **TPH2-ChETA neurons in DRin DBA/1 mice**

4 A, neuronal immunostaining of c-fos , TPH2, GFP and co-localization c-fos,TPH2 and GFP  
5 in a DBA/1 mouse that was implanted with fiber optic cannula without photostimulation (n =  
6 2 mice). B, immunostaining of c-fos-, TPH2 GFP and co-localization c-fos, TPH2 and GFP, in  
7 an implanted DBA/1 mouse with photostimulation at 15 mW for 20 min (n = 2 mice). C,  
8 quantification of c-fos(+)/GFP(+)/TPH2(+) cells in implanted DBA/1 mice without  
9 photostimulation and those in implanted DBA/1 mice with photostimulation. No PS = no  
10 photostimulation; PS = photostimulation

11 **Figure 11 Mechanism of 5-HT neurons in brain modulates the S-IRA and SUDEP via the**  
12 **neural circuit between DRand the pre-Bötzinger complex**

13 SUDEP: sudden unexpected death in epilepsy; S-IRA; seizure-induced respiratory arrest;  
14 KET: ketanserin; PBC; pre-Bötzinger complex; DR; dorsal raphe nucleus; 5HT2AR; 5HT2A  
15 receptor

16 **10. References**

- 17 1. Devinsky O, Hesdorffer DC, Thurman DJ, Lhatoo S, Richerson G. (2016). Sudden  
18 unexpected death in epilepsy: epidemiology, mechanisms, and prevention. *Lancet Neurol*  
19 (15), 1075-1088.
- 20 2. Philippe Ryvlin, Lina Nashef, Samden D Lhatoo, Lisa M Bateman, Jonathan Bird,  
21 Andrew Bleasel et al. Incidence and mechanisms of cardiorespiratory arrests in epilepsy  
22 monitoring units (MORTEMUS): a retrospective study.(2013). *Lancet Neurol*  
23 12(10):966-977.
- 24 3. Lhatoo S, Noebels J, Whittemore V, NINDS Center for SUDEP Research. (2015).  
25 Sudden unexpected death in epilepsy: identifying risk and preventing mortality,  
26 *Epilepsia* (56), 1700–1706.
- 27 4. Massey CA, Sowers LP, Dlouhy BJ, Richerson GB. (2014). Mechanisms of sudden  
28 unexpected death in epilepsy: the pathway to prevention. *Nat Rev Neurol* (10), 271-82.
- 29 5. Zhang H, Zhao H, Yang X, Xue Q, Cotten JF, Feng HJ. (2016). 5-Hydroxytryptophan, a  
30 precursor for serotonin synthesis, reduces seizure-induced respiratory arrest. *Epilepsia*

- 1 (57), 1228-1235.
- 2 6. Zhao H, Zhang H, Schoen FJ, Schachter SC, Feng HJ. (2019). Repeated generalized  
3 seizures can produce calcified cardiac lesions in DBA/1 mice. *Epilepsy Behav* 95 (4)  
4 169-174.
- 5 7. Zhang H, Zhao H, Zeng C, Van Dort C, Faingold CL, Taylor NE, et al. (2018).  
6 Optogenetic activation of 5-HT neurons in the dorsal raphe suppresses seizure-induced  
7 respiratory arrest and produces anticonvulsant effect in the DBA/1 mouse SUDEP model.  
8 *Neurobiol Dis* (110), 47-58.
- 9 8. Zhang H, Zhao H, Feng HJ. (2017). Atomoxetine, a norepinephrine reuptake inhibitor,  
10 reduces seizure-induced respiratory arrest. *Epilepsy Behav* 73:6-9.
- 11 9. Zhao H, Cotten JF, Long X, Feng HJ. (2017). The effect of atomoxetine, a selective  
12 norepinephrine reuptake inhibitor, on respiratory arrest and cardiorespiratory function in  
13 the DBA/1 mouse model of SUDEP. *Epilepsy Res* (137), 139-144.
- 14 10. Yue Shen, Hai XiangMa, Han Lu, Hai Ting Zhao, Jian liang Sun, Yuan Cheng, HongHai  
15 Zhang. (2021).Central deficiency of norepinephrine synthesis and norepinephrinergic  
16 neurotransmission contributes to seizure-induced respiratory arrest. *Biomedicine &*  
17 *Pharmacotherapy* 133, 2021, 111024.
- 18 11. Tryba AK, Peña F, Ramirez JM. (2006). Gasping Activity In Vitro: A Rhythm Dependent  
19 on 5-HT<sub>2A</sub> Receptors. *J. Neurosci.* 26:2623-2634.
- 20 12. Peña F, Ramirez JM. (2002). Endogenous activation of serotonin-2A receptors is  
21 required for respiratory rhythm generation in vitro. *J. Neurosci.* 15:22:11055-11064.
- 22 13. Ozawa Y, Okado N. (2002). Alteration of serotonergic receptors in the brain stems of  
23 human patients with respiratory disorders. *Neuropediatrics.* 33:142-149.
- 24 14. Bateman LM, Li CS, Lin TC, Seyal M. (2010). Serotonin reuptake inhibitors are  
25 associated with reduced severity of ictal hypoxemia in medically refractory partial  
26 epilepsy. *Epilepsia* (51), 2211-2214.
- 27 15. Buchanan GF, Murray NM, Hajek MA, Richerson GB. Serotonin neurones have  
28 anti-convulsant effects and reduce seizure-induced mortality. *J. Physiol.*  
29 2014;592:4395-4410.
- 30 16. Alexandra N Petrucci, Katelyn G Joyal, Benton S Purnell, Gordon F Buchanan. (2020).

- 1 Serotonin and sudden unexpected death in epilepsy. *Exp Neurol* 325:113-145.
- 2 17. E. Donato Di Paola, P. Gareri, A. Davoli, S. Gratteri, F. Scicchitano, C. Naccari, et al.  
3 (2007). Influence of levetiracetam on the anticonvulsant efficacy of conventional  
4 antiepileptic drugs against audiogenic seizures in DBA/2 mice, *Epilepsy Res* 75  
5 112–121.
- 6 18. C. Soper, E. Wicker, C.V. Kulick, P. N’Gouemo, P.A. Forcelli. (2016). Optogenetic  
7 activation of superior colliculus neurons suppresses seizures originating in diverse brain  
8 networks, *Neurobiol. Dis.* (87) 102–115.
- 9 19. Zhang X, Beaulieu JM, Sotnikova TD, et al. Tryptophan hydroxylase- 2 controls brain  
10 serotonin synthesis. *Science* 2004;305:217.
- 11 20. Kulikov AV, Osipova DV, Naumenko VS, et al. Association between Tph2 gene  
12 polymorphism, brain tryptophan hydroxylase activity and aggressiveness in mouse  
13 strains. *Genes Brain Behav* 2005;4:482–485.
- 14 21. Osipova DV, Kulikov AV, Mekada K, et al. Distribution of the C1473G polymorphism in  
15 tryptophan hydroxylase 2 gene in laboratory and wild mice. *Genes Brain Behav*  
16 2010;9:537–543.
- 17 22. Qinglan Chen, Fafa Tian, Qiang Yue, Qiong Zhan, Mian Wang, Bo Xiao, Chang  
18 Zeng.(2014). Decreased serotonin synthesis is involved in seizure-induced respiratory  
19 arrest in DBA/1 mice. *Neuroreport* 30(12):842-846.

Figure 1

A

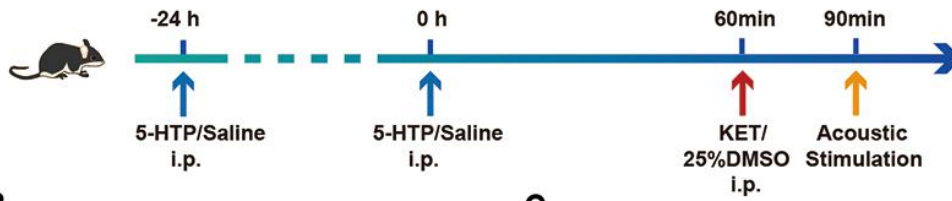

B

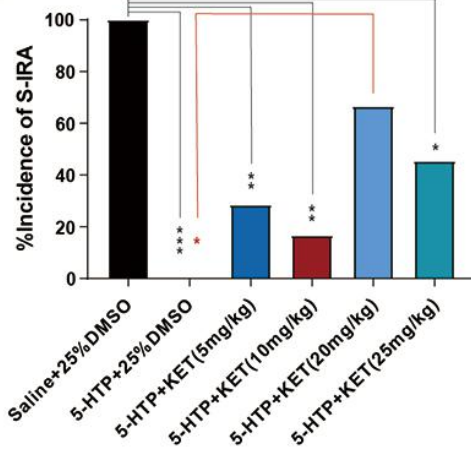

C

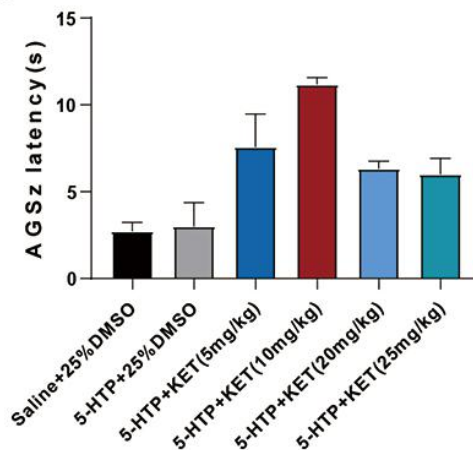

D

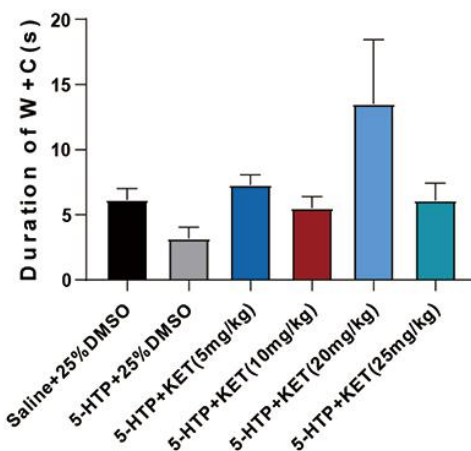

E

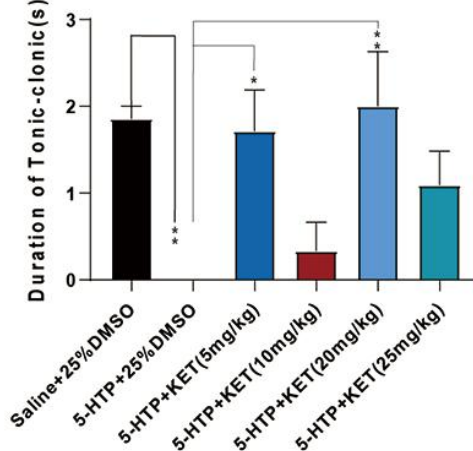

F

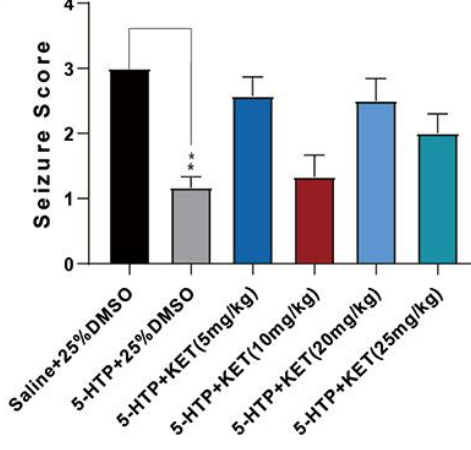

**Figure2**

**A**

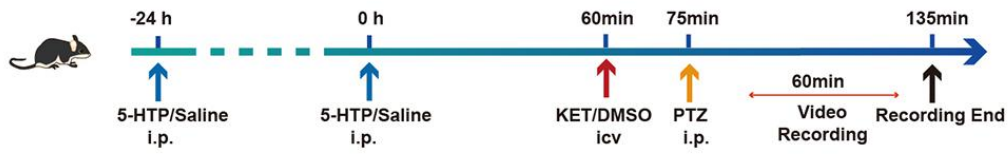

**B**

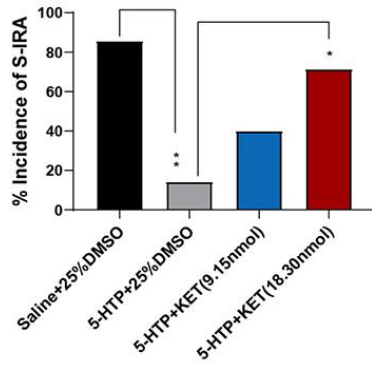

**C**

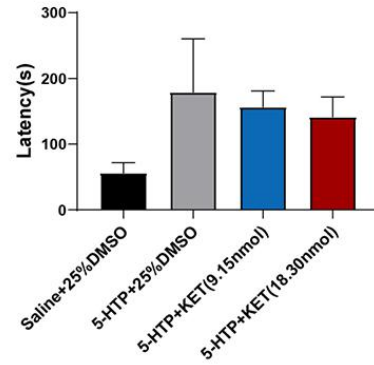

**D**

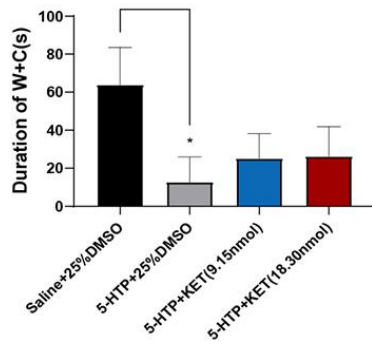

**E**

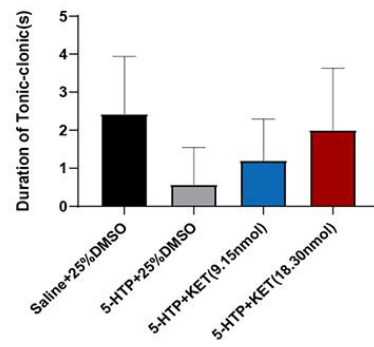

**F**

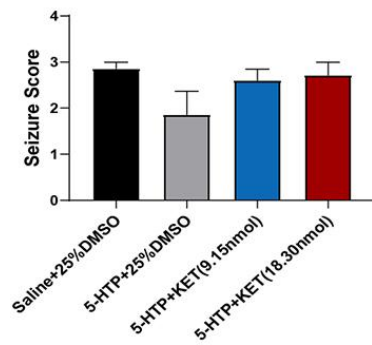

**G**

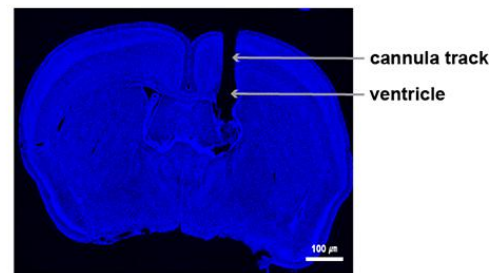

1

**Figure 3**

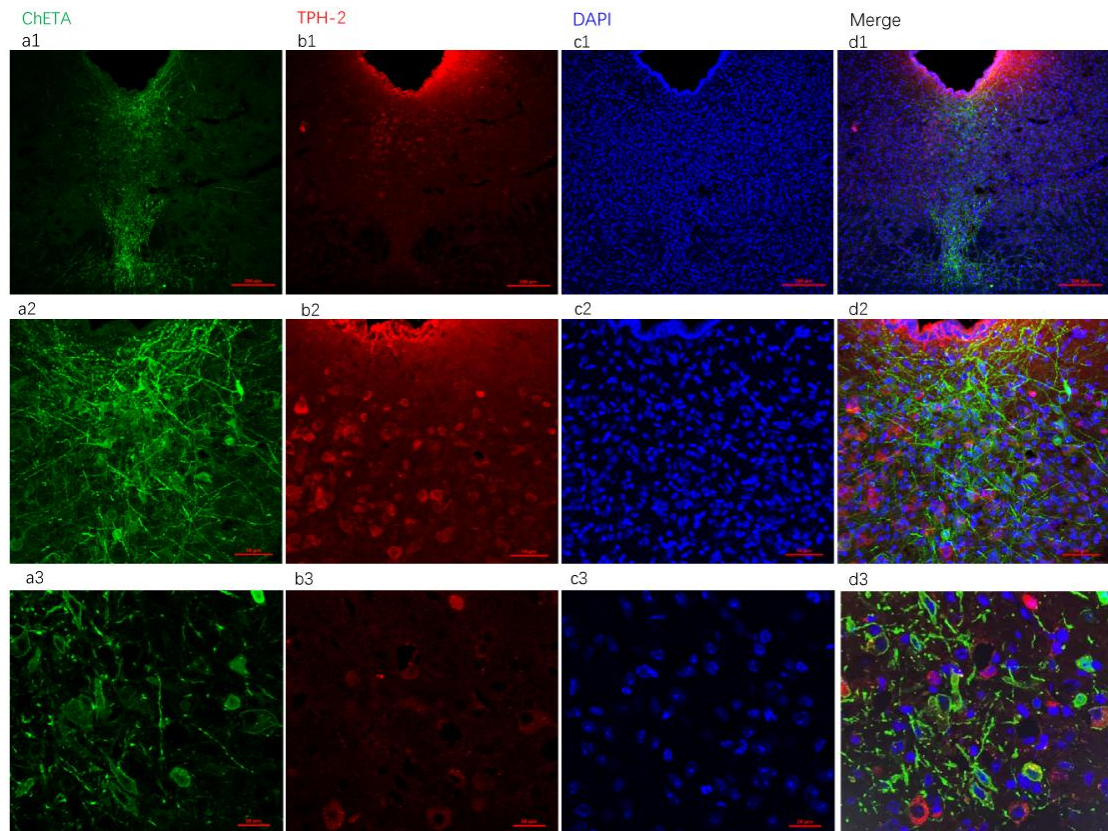

**Figure 4**

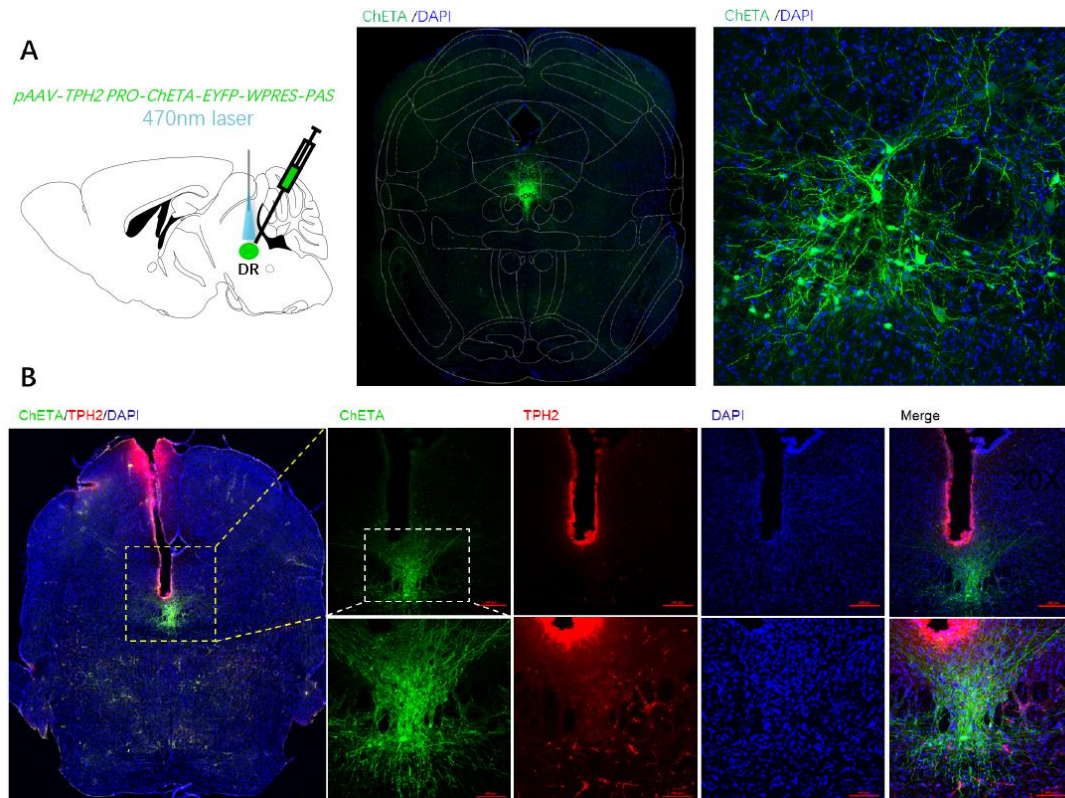



**Figure 5**

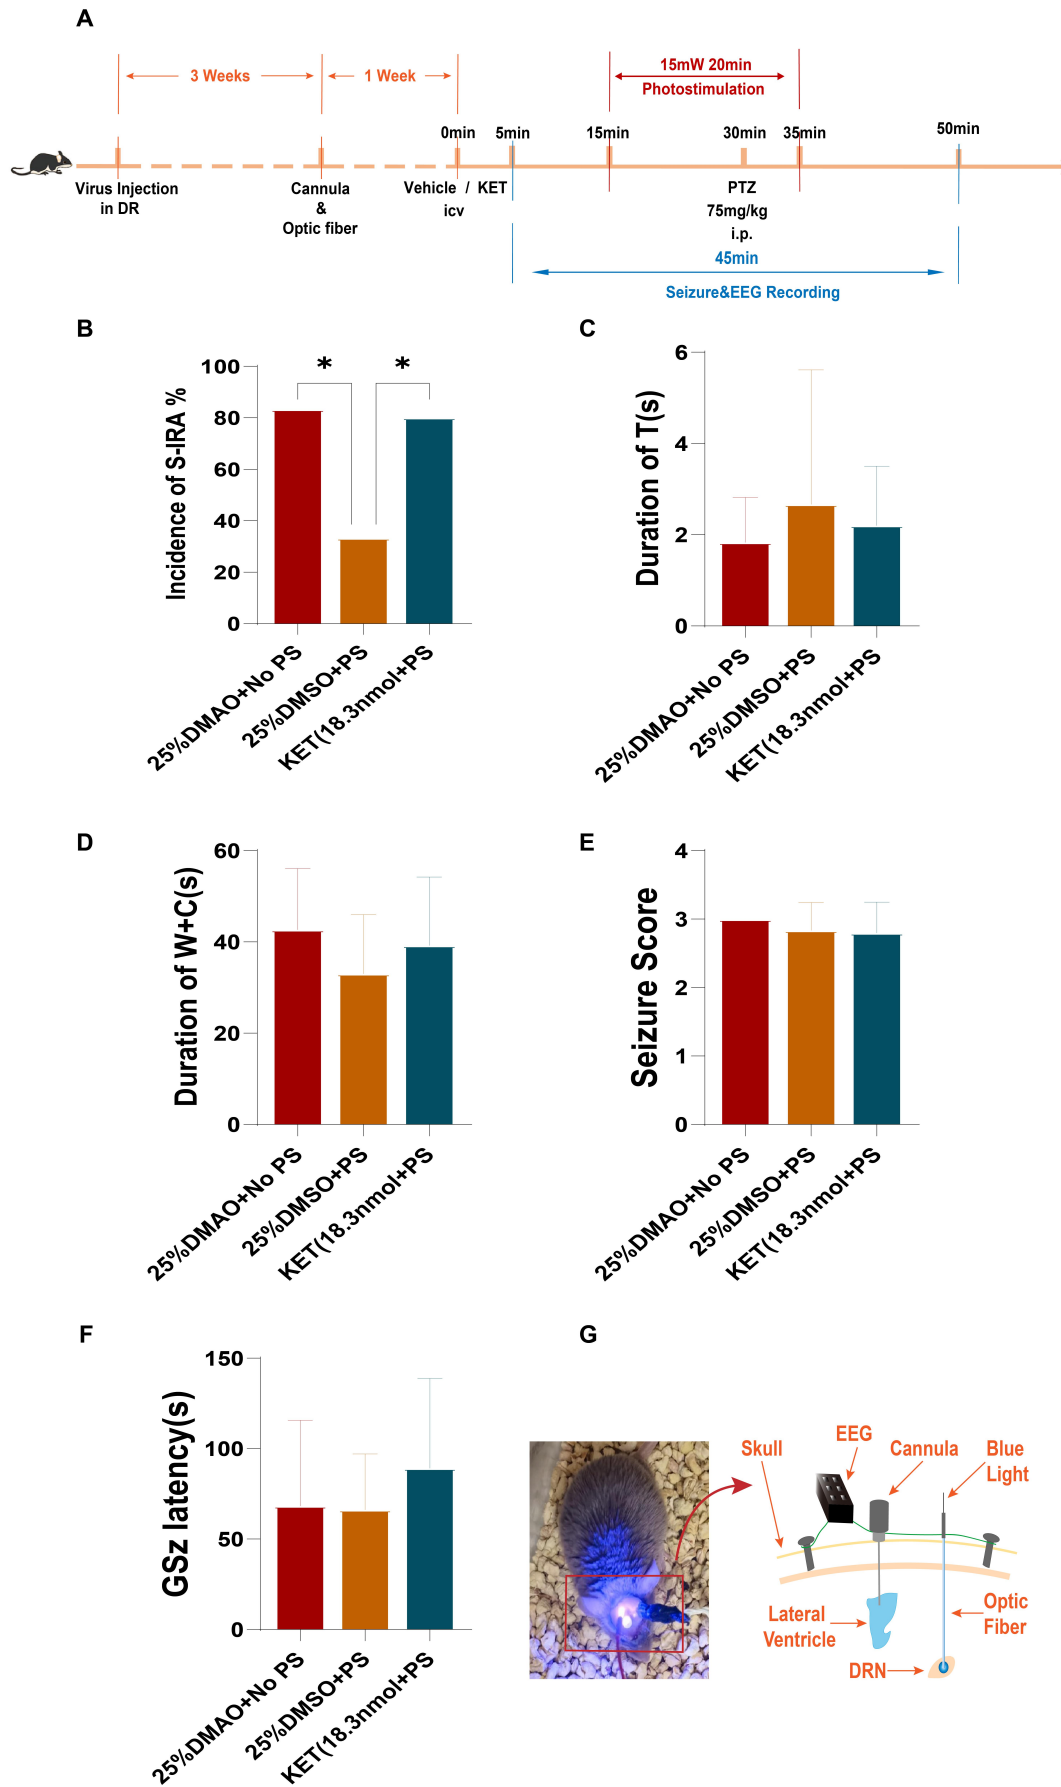

Figure 6

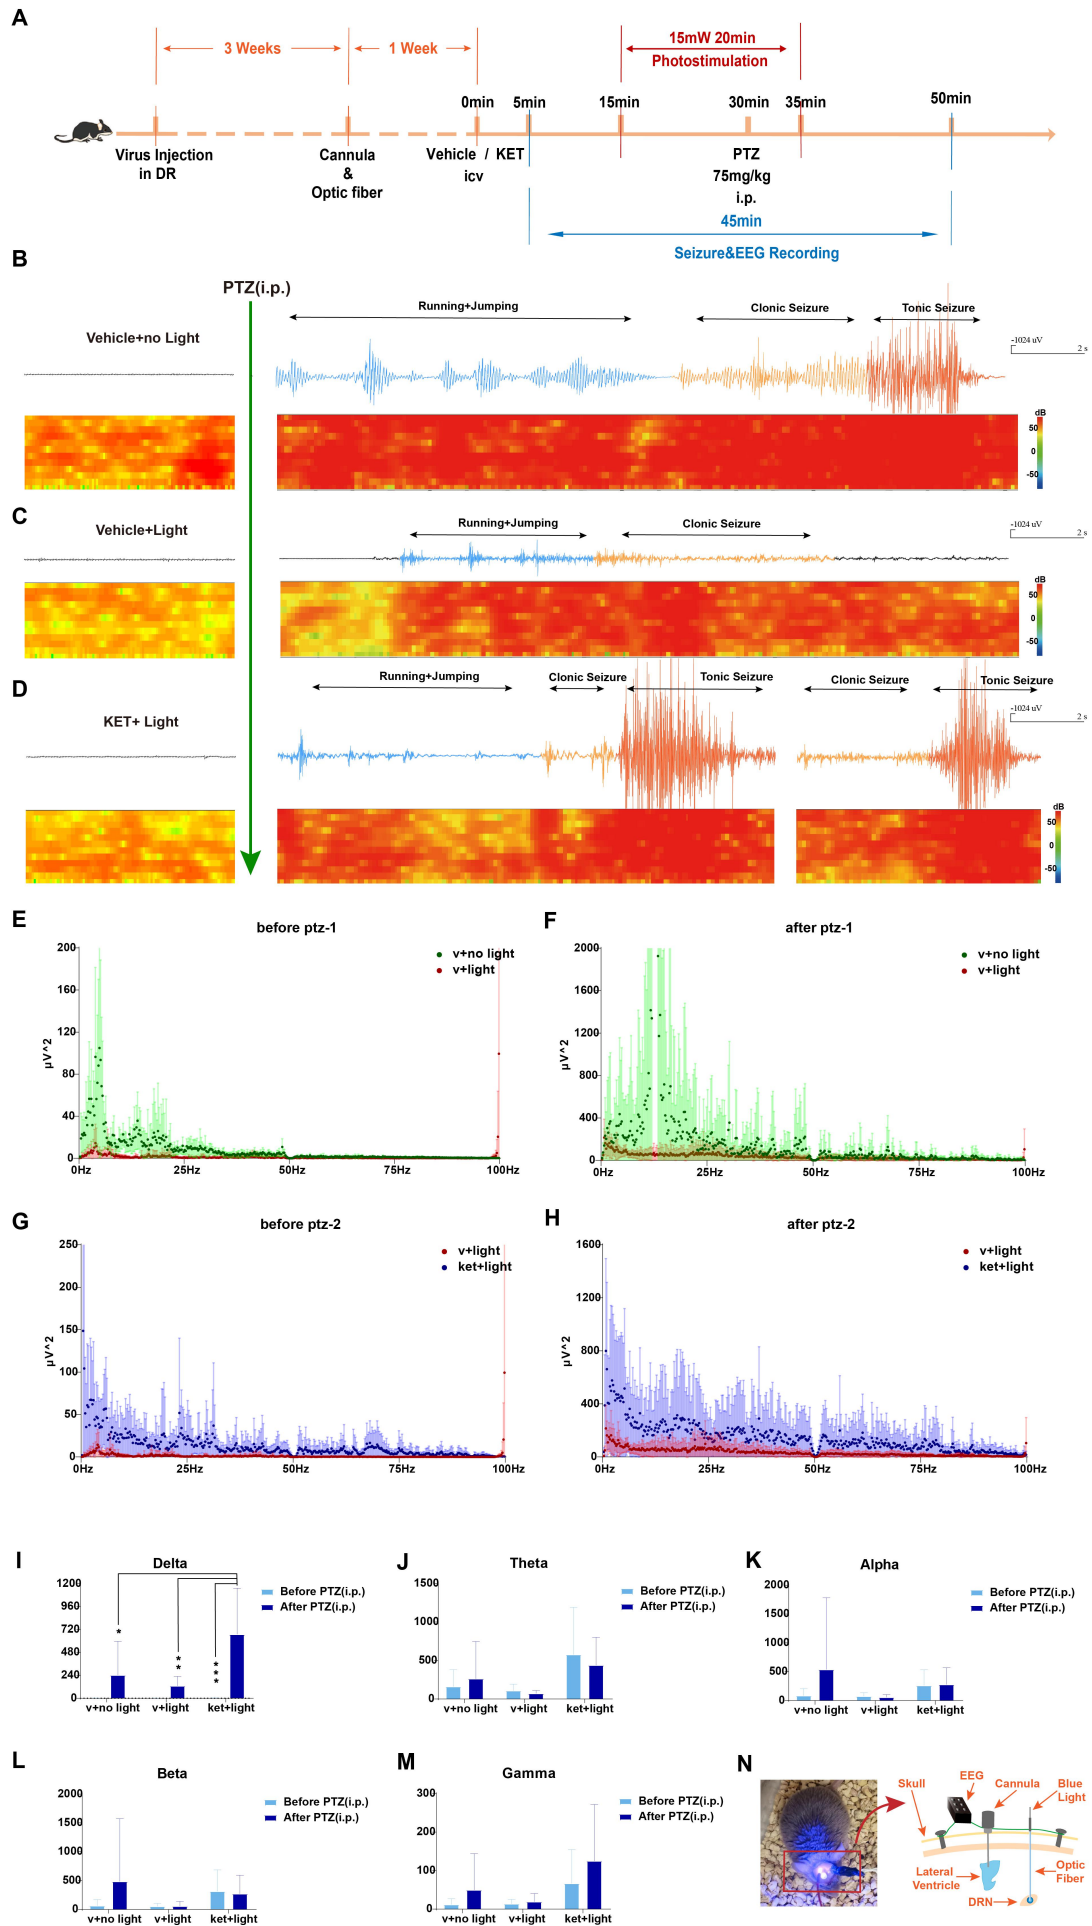

**Figure 7**

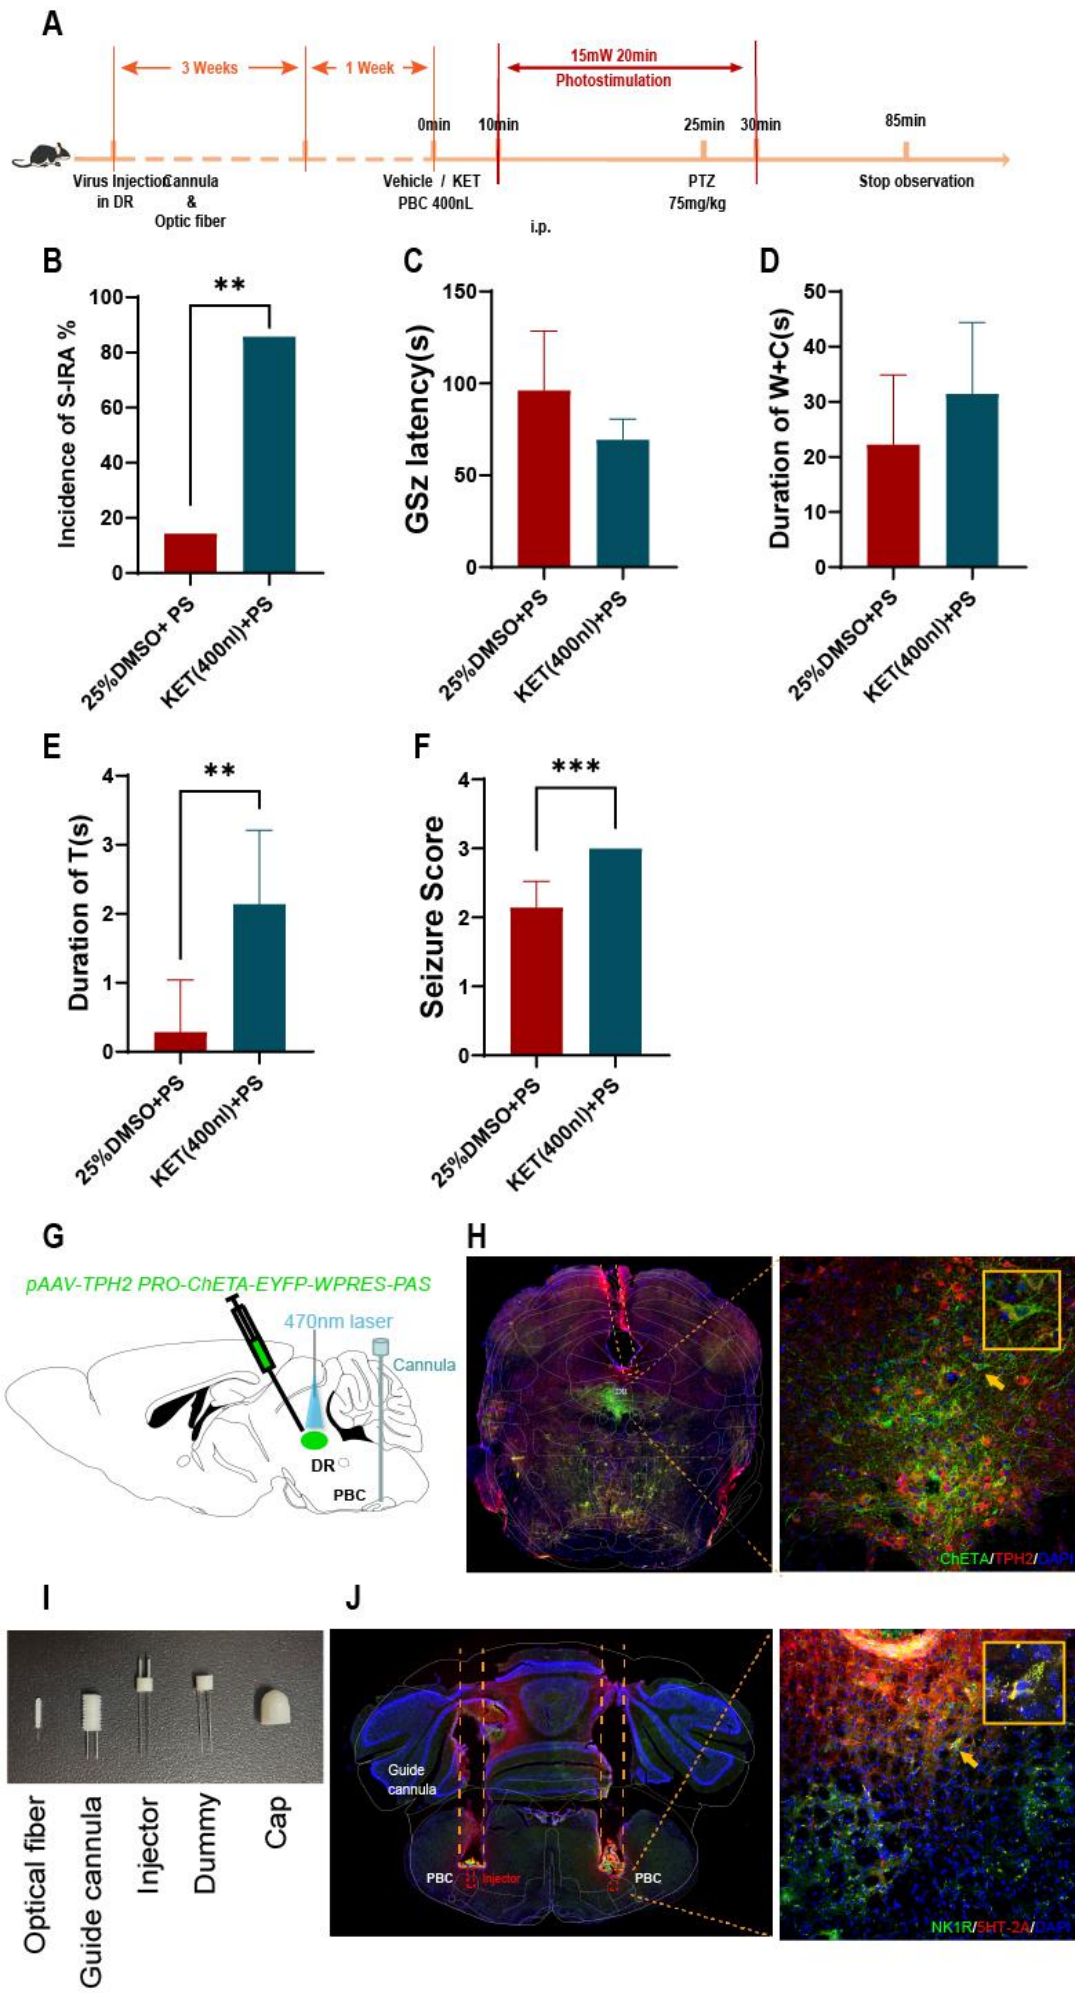

Figure 8

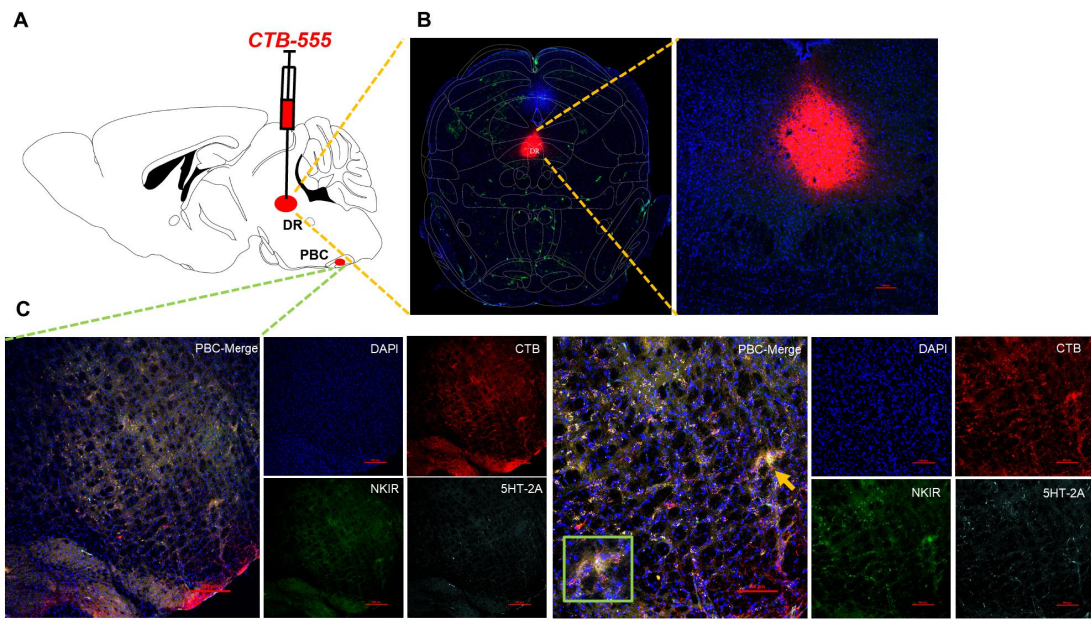

Figure 9

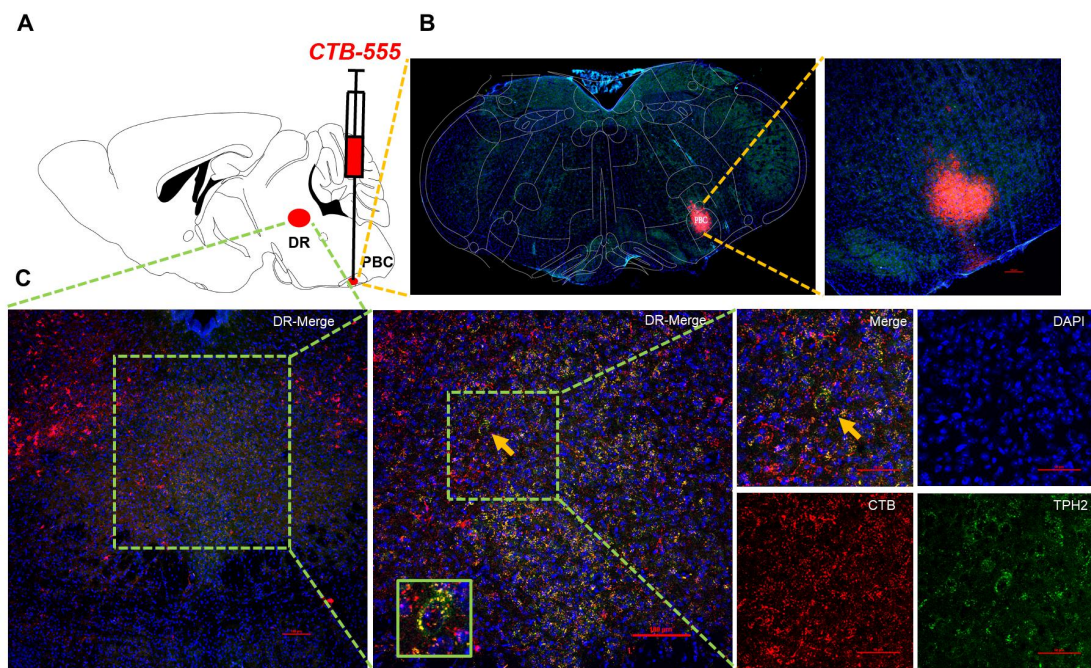

Figure 10

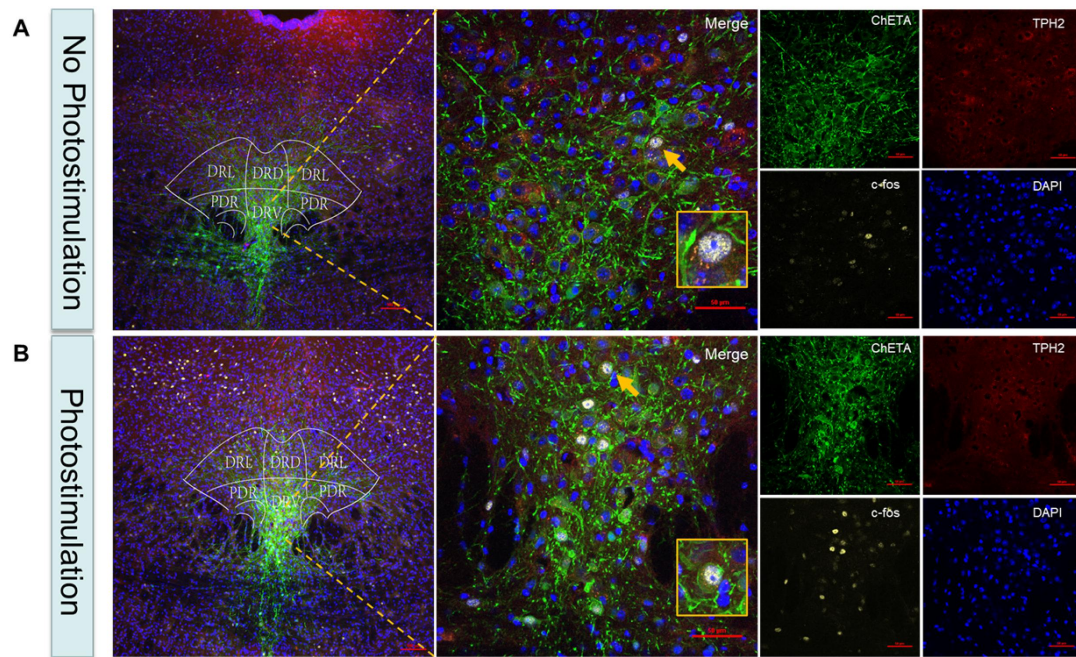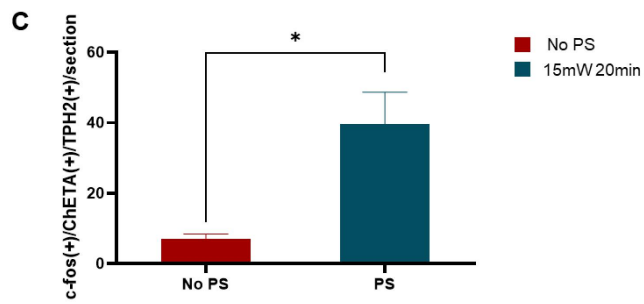

1

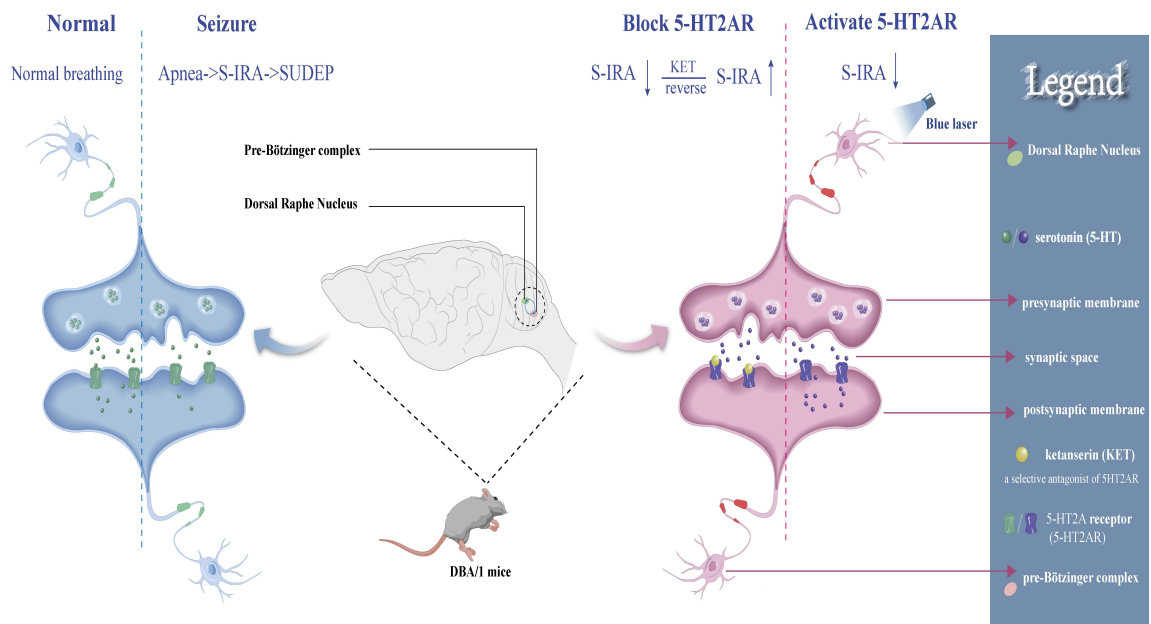

2
